# Supplementary material for: Altered Composition of Gut Microbiota in Depression: A Systematic Review
Source: PubMed Central journal article supplement (PMC7299157; doi:10.3389/fpsyt.2020.00541), 2020-06-10
Supplement: Image_1.pdf [file Image_1.pdf]

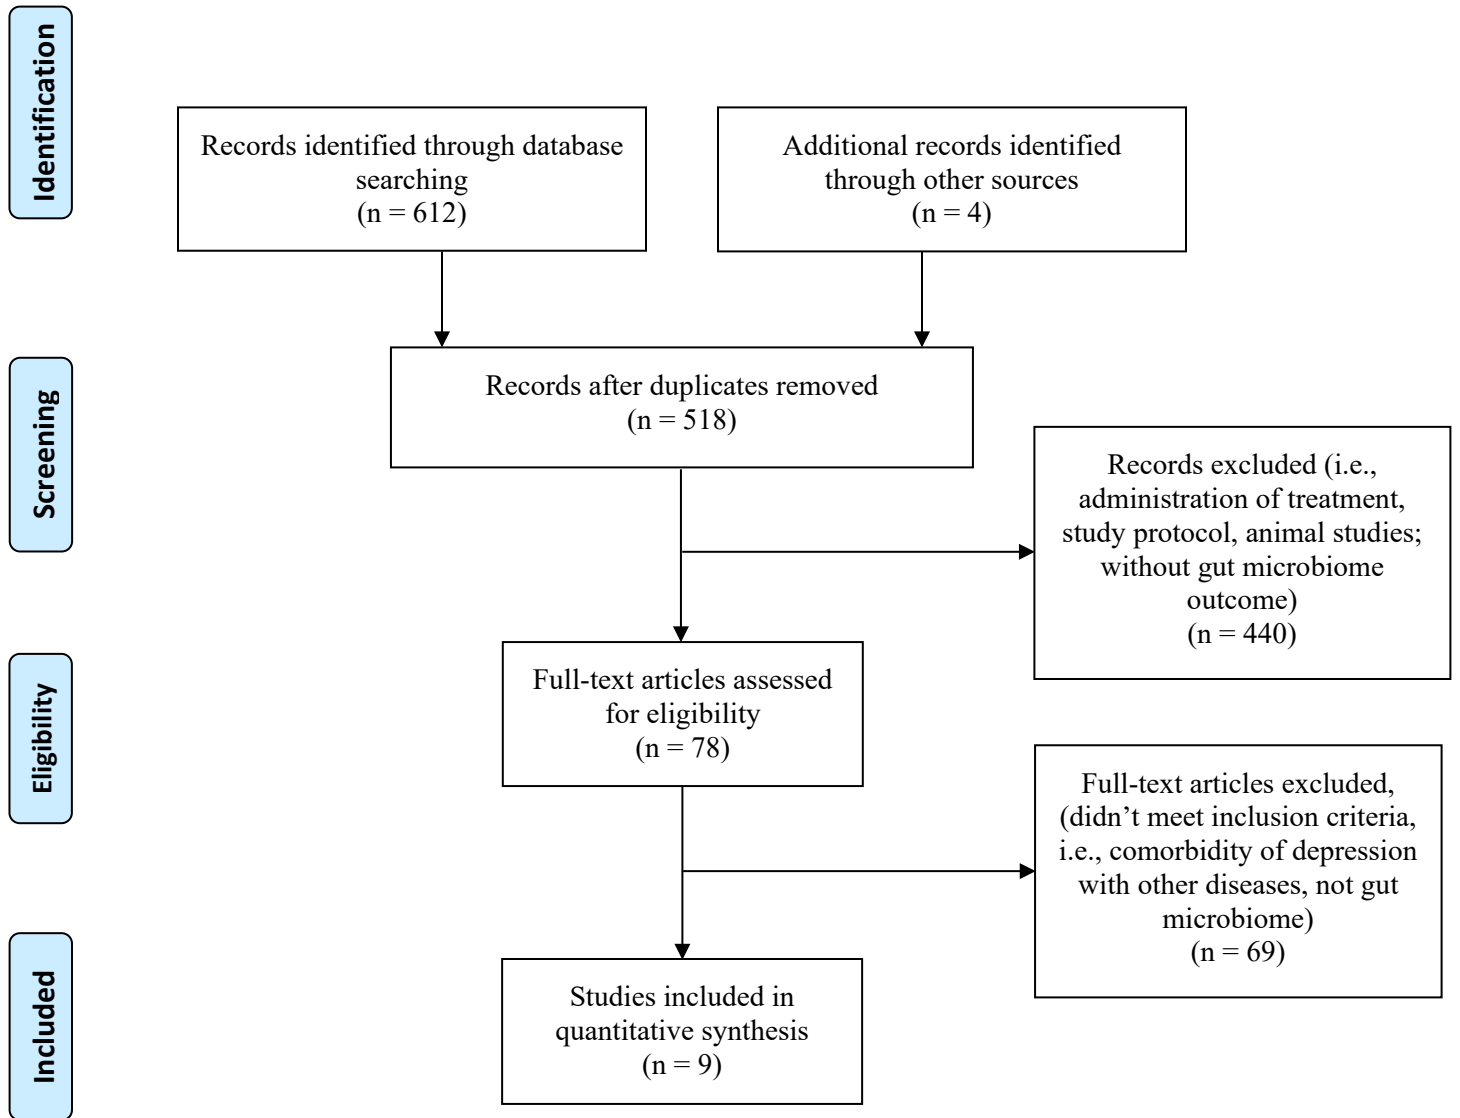

Figure S1: PRISMA flow diagram of the studies of gut microbiome pattern in depression.
